# Supplementary material for: FTIR imaging of the 3D extracellular matrix used to grow colonies of breast cancer cell lines
Source: Royal Society of Chemistry journal article supplement (doi:10.1039/c5an01997d), 2015-11-16
Supplement: c5an01997d1.pdf [file c5an01997d1.pdf]

## FTIR imaging of the 3D extracellular matrix used to grow colonies of breast cancer cell lines

Margarita Smolina and Erik Goormaghtigh

### Supplementary Materials

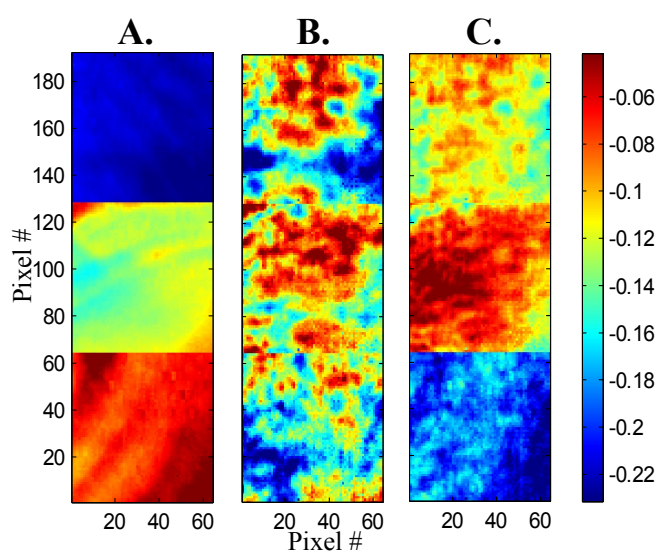

Figure S1: analysis of 3 samples of pure Matrigel which have been FFPE processed. A. absorbance at  $1654\text{ cm}^{-1}$ , B. score of the spectra on the 4<sup>th</sup> PC computed between  $1800$  and  $1000\text{ cm}^{-1}$  on all the spectra of this image, C. score of the spectra on the 4<sup>th</sup> PC computed between  $1800$  and  $1000\text{ cm}^{-1}$  on the spectra presented in figure 2C., i.e. curve a. in Figure 2E. The color bar scale refers to C. The corresponding absorbance scale is 0.15 to 0.60 for A and 0 to 0.12 for B.

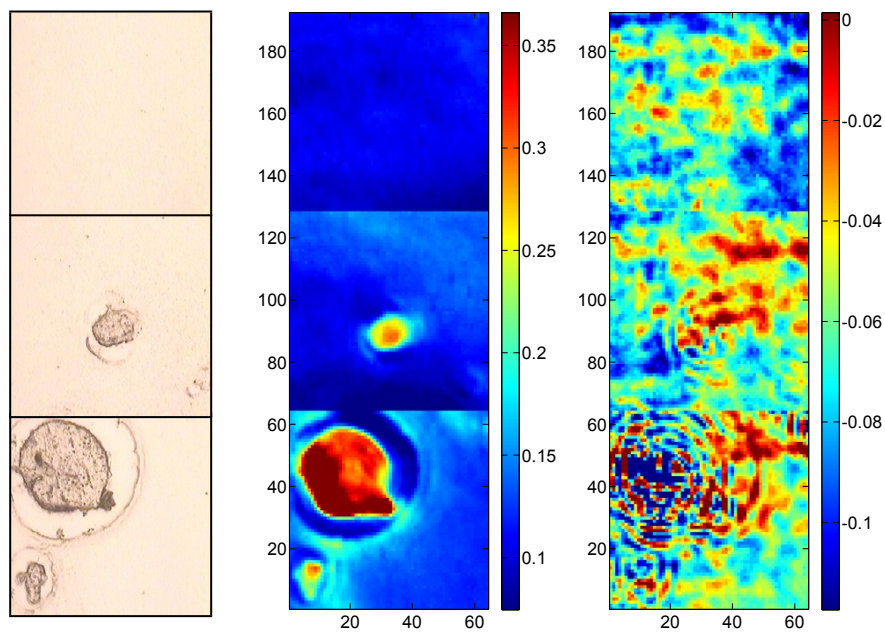

Figure S2: Analysis of three images corresponding to three different areas of the same FFPE-processed 3D culture of MCF-7 cells grown in Matrigel for 10 days. The three images (12,288 spectra) have been merged in a single dataset and analyzed together. **A.** bright field view, **B.** Absorbance at  $1654\text{ cm}^{-1}$ . **C.** Scores of the spectra on the 4<sup>th</sup> principal component ( $1800\text{-}1000\text{ cm}^{-1}$  interval). No processing was applied.

**MDA-MB-231**

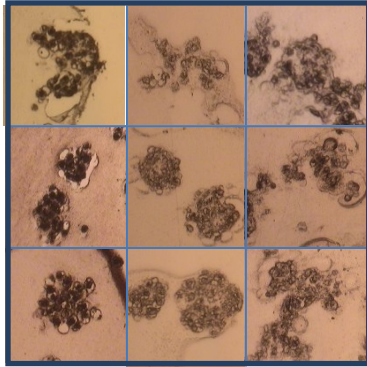

**T-47D**

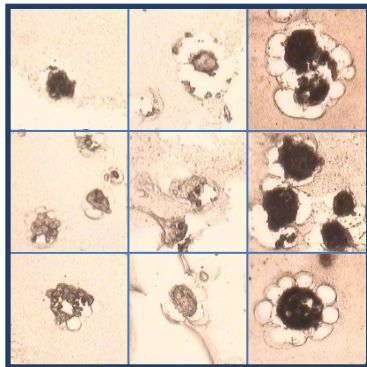

**SK-BR-3**

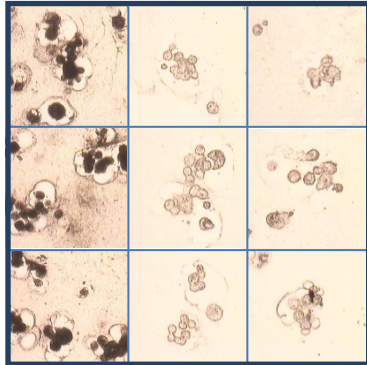

Figure S3: bright field images of the samples presented in Figure 2

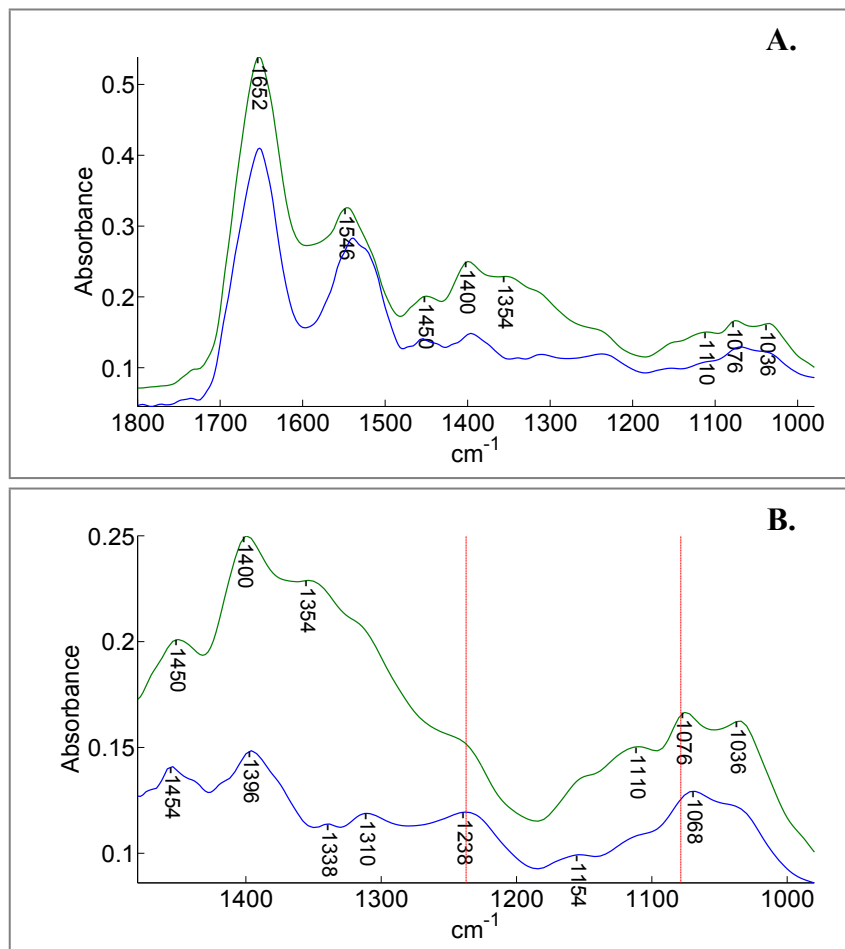

Figure S4: **A.** Mean spectrum of a FTIR image (4,096 spectra) of untreated and dried pure Matrigel (trace in green) and mean spectrum of a FTIR image (4,096 spectra) of FFPE-processed pure Matrigel (trace in blue) represented between 1800-1000  $\text{cm}^{-1}$  and **B.** 1500-1000  $\text{cm}^{-1}$ . The red vertical lines indicate the two bands discussed in the text. No processing was applied.
